# Supplementary figures and images for: Invasive coronary physiology in patients with angina and non-obstructive coronary artery disease: a consensus document from the coronary microvascular dysfunction workstream of the British Heart Foundation/National Institute for Health Research Partnership
Source: HighWire-hosted journal article supplement (doi:10.1136/heartjnl-2021-320718), 2022-03-22

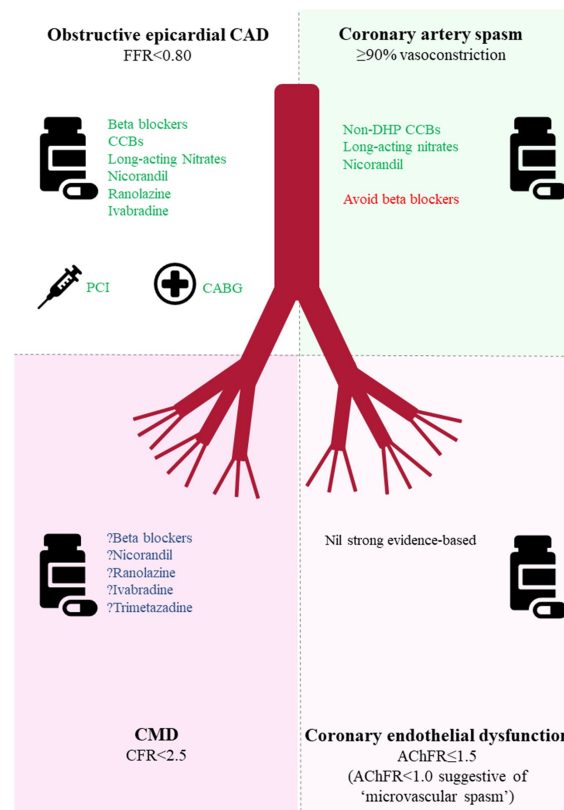

Supplement: heartjnl-2021-320718supp001_data_supplement.pdf [file heartjnl-2021-320718supp001_data_supplement.pdf]
